# Supplementary material for: Upregulation of the AMPK-FOXO1-PDK4 pathway is a primary mechanism of pyruvate dehydrogenase activity reduction in tafazzin-deficient cells
Source: PubMed Central journal article supplement (PMC11106297; doi:10.1038/s41598-024-62262-1), 2024-05-20

Fig S5

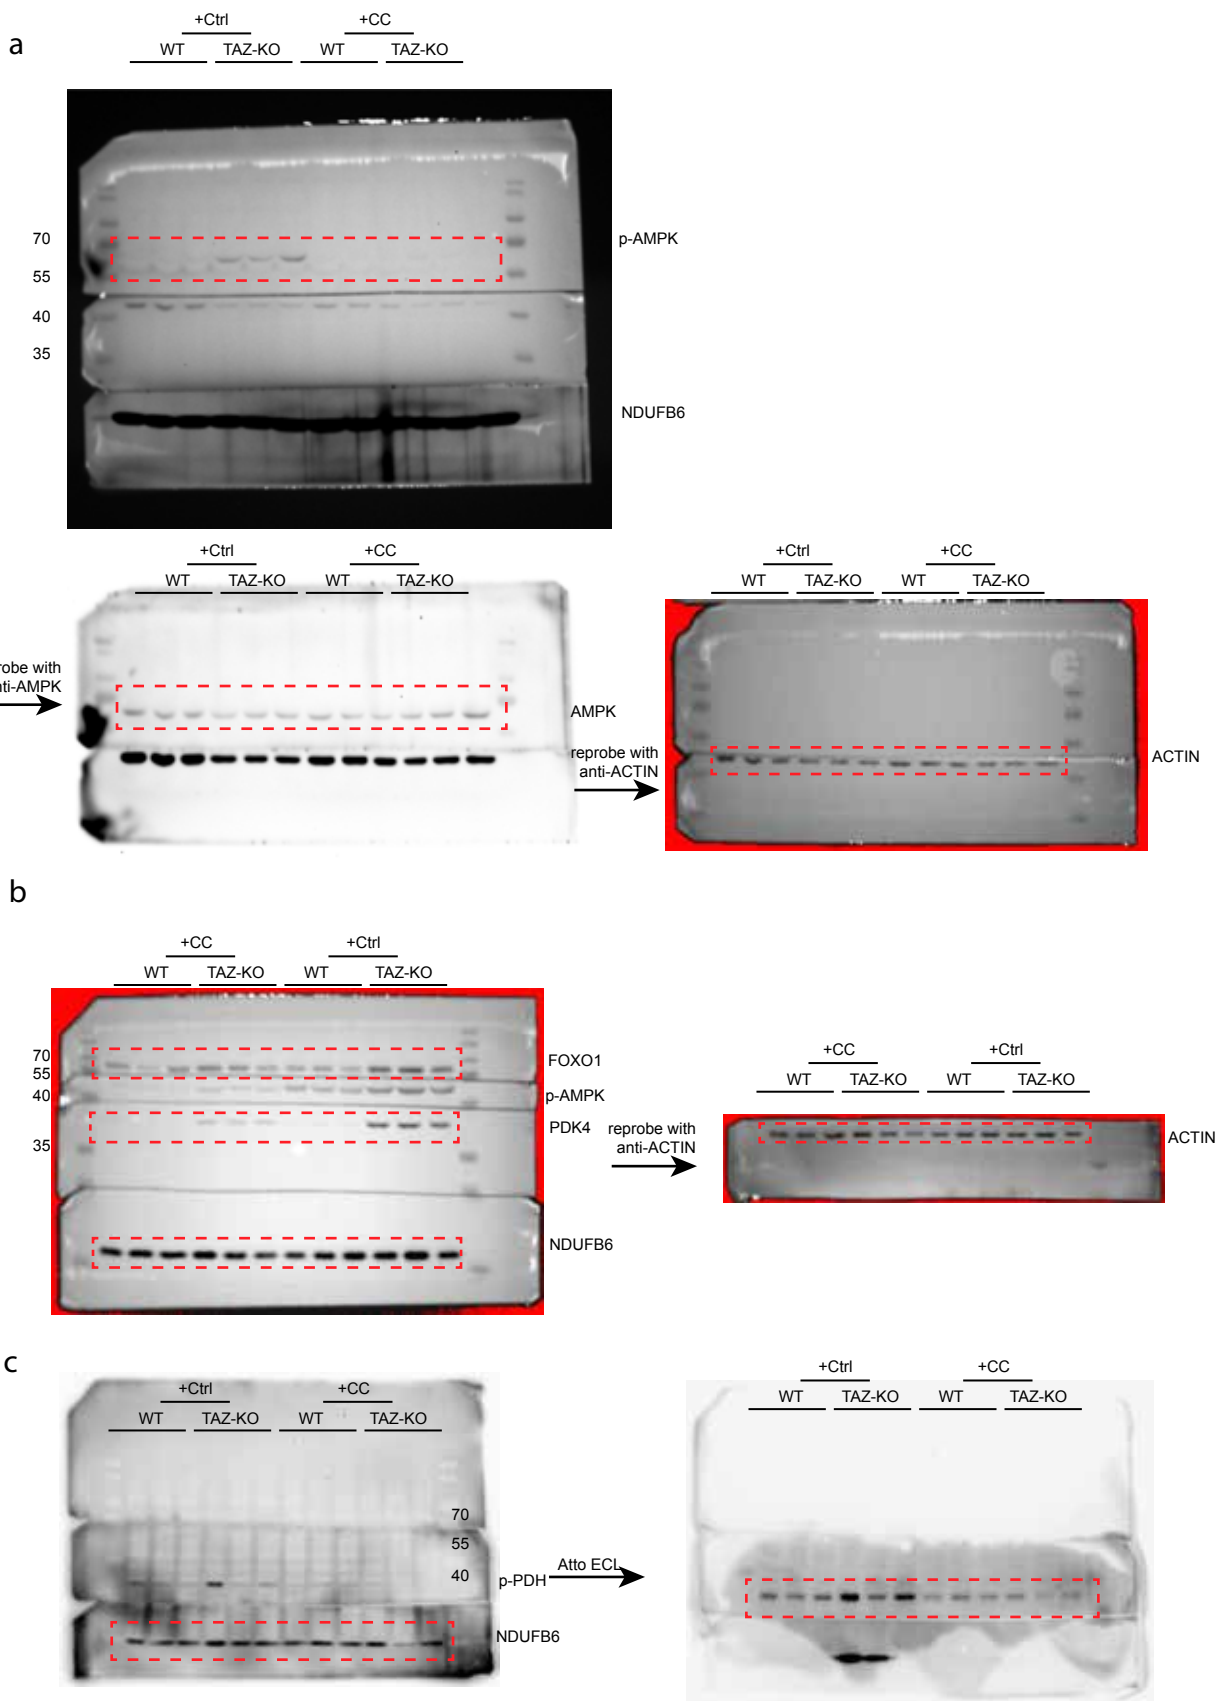

Supplement: 41598_2024_62262_MOESM5_ESM.pdf [file 41598_2024_62262_MOESM5_ESM.pdf]
